# Supplementary material
Source: PubMed Central journal article supplement (PMC5726805)
Supplement: NIHMS913835-supplement-Online_Supplemental_methods__figure__and_tables.pdf [file NIHMS913835-supplement-Online_Supplemental_methods__figure__and_tables.pdf]

**ONLINE SUPPLEMENT**

Supplemental Methods

Supplemental Figure I

Supplemental Table I

Supplemental Table II

Supplemental Table III

Supplemental Table IV

Supplemental Table V

Supplemental References

## Supplemental Methods

In both cohorts of the Nurses' Health Study (NHS) and Health Professionals Follow-up Study (HPFS), information on body height and weight, medical history, lifestyle characteristics (e.g., cigarette smoking and physical activity), disease diagnoses (e.g., diabetes, hypertension, and hypercholesterolemia), family history, menopausal status and postmenopausal hormone use (NHS only), and other characteristics were collected at baseline and updated at each biennial follow-up cycle using validated questionnaires. Through 2010, a response rate exceeding 90% has been achieved in each follow-up period of both cohorts. Detailed descriptions on the validity and reproducibility of self-reported body weight, physical activity, and alcohol consumption have been published elsewhere<sup>1-3</sup>. Body mass index (BMI) was calculated as weight divided by squared height ( $\text{kg}/\text{m}^2$ ). Physical activity was expressed as metabolic equivalent (MET) hours per week by summing the product of moderate or vigorous exercise duration with MET value specific to each activity. Alcohol intake was assessed and updated by the semi-quantitative food frequency questionnaires (sFFQs) every four years. Total energy intake was calculated by summing up energy intakes from all foods. An alternative healthy eating index (aHEI) score was calculated by summarizing consumption of 11 foods and nutrients predictive of chronic disease risk, including fruits, vegetables, whole grains, nuts and legumes, red and processed meat, sugar-sweetened beverages and fruit juice, alcohol, sodium, *trans* fat, long-chain n-3 fat and polyunsaturated fat as an indicator of adherence to healthy eating behavior<sup>4</sup>. In the current study, we modified the aHEI score by excluding whole grain consumption.

To better represent long-term or habitual dietary pattern, and to minimize within-person variation, we calculated and applied the cumulative average of dietary intake based on the repeated valid sFFQ assessments. We replaced missing values in each sFFQ with cumulative averages based on prior valid assessments. To minimize reverse causation bias, we stopped updating information on diet after participants reported a diagnosis of diabetes, cardiovascular disease (CVD), or cancer during follow-up, because diagnosis of these conditions might lead to altered eating habits by consuming healthier foods including those rich in whole grains and therefore may confound the associations between whole grain consumption and risk of ischemic stroke. We then carried forward the cumulative averages of dietary variables prior to the development of these diseases to represent diet for later follow-up.

Supplemental Figure I. Intake of whole grain composition over the years in NHS and HPFS.

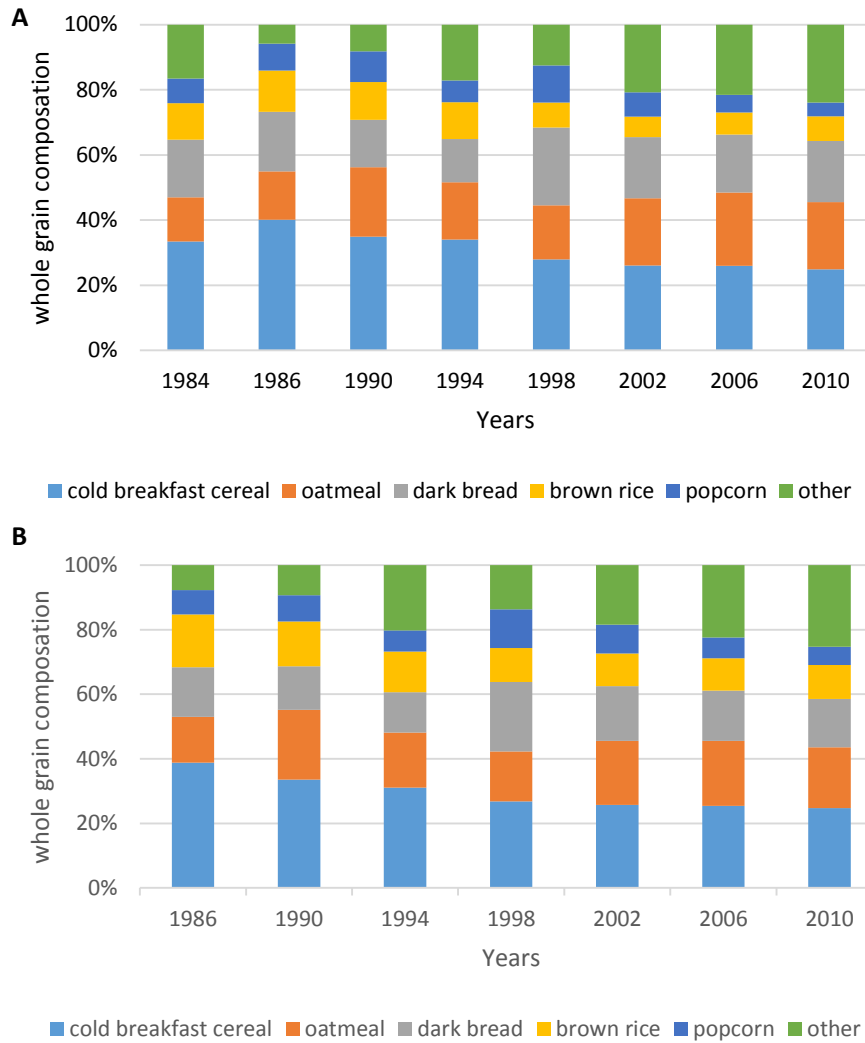

Intake of whole grain composition over the years in NHS (A) and HPFS (B). The areas of different colors represent the percent of total whole grains of each specific individual whole grain foods.

Abbreviations: NHS, Nurses' Health Study; HPFS, Health Professionals Follow-up Study.

SUPPLEMENTAL MATERIAL

Supplemental Table I. Baseline Characteristics of Participants according to Intake Levels of Total Whole Grain, the Nurses' Health Study (NHS, 1984) and Health Professionals Follow-up Study (HPFS, 1986).\*

|                                      | Quintiles in NHS |             |              | Quintiles in HPFS |             |              |
|--------------------------------------|------------------|-------------|--------------|-------------------|-------------|--------------|
|                                      | Q1               | Q3          | Q5           | Q1                | Q3          | Q5           |
| Participants, n                      | 14307            | 14481       | 14371        | 8559              | 8492        | 8570         |
| Age, years                           | 50.1(7.1)        | 50.1(7.1)   | 50.2(7.2)    | 53.2(9.5)         | 53.2(9.6)   | 53.2(9.5)    |
| Caucasian, %                         | 97               | 98          | 98           | 92                | 96          | 95           |
| BMI, kg/m <sup>2</sup>               | 25.1(4.8)        | 25.1(4.5)   | 24.3(4.0)    | 25.2(5.2)         | 25.1(5.0)   | 24.3(4.7)    |
| Alcohol intake, g/day                | 9.5(14.7)        | 7.0(10.8)   | 4.7(7.8)     | 14.6(18.9)        | 11.7(15.3)  | 8.2(11.4)    |
| Physical activity, MET-hours/week    | 11.7(17.5)       | 14.2(21.6)  | 16.6(22.8)   | 18.1(29.0)        | 20.8(28.3)  | 26.2(33.8)   |
| Total energy intake, kcal/day        | 1,712(553)       | 1,785(541)  | 1,654(477)   | 1,986(652)        | 2,061(640)  | 1,879(557)   |
| Modified aHEI score <sup>†</sup>     | 42.8(9.9)        | 45.6(9.7)   | 49.5(10.6)   | 46.0(10.6)        | 49.8(10.3)  | 54.6(10.3)   |
| Smoking status, %                    |                  |             |              |                   |             |              |
| Never smoker                         | 36               | 45          | 51           | 42                | 51          | 57           |
| Past smoker                          | 27               | 32          | 35           | 41                | 41          | 39           |
| Current smoker                       | 36               | 23          | 14           | 17                | 8           | 4            |
| Family history of MI, %              | 39               | 39          | 38           | 31                | 31          | 33           |
| Hypertension, %                      | 22               | 20          | 18           | 23                | 19          | 18           |
| High cholesterol, %                  | 7                | 7           | 8            | 9                 | 10          | 13           |
| Multivitamin use, %                  | 30               | 37          | 44           | 35                | 41          | 50           |
| Ever menopausal hormone use, %       | 19               | 21          | 24           | -                 | -           | -            |
| Total fruit intake, servings/day     | 1.79(1.12)       | 2.13(1.11)  | 2.31(1.12)   | 1.90(1.52)        | 2.37(1.52)  | 2.71(1.69)   |
| Total vegetable intake, servings/day | 2.33(1.04)       | 2.55(1.08)  | 2.61(1.14)   | 2.69(1.58)        | 3.08(1.65)  | 3.32(1.87)   |
| Red meat intake, servings/day        | 0.95(0.59)       | 0.86(0.52)  | 0.64(0.45)   | 0.96(0.66)        | 0.83(0.58)  | 0.52(0.46)   |
| Whole grains, g/day                  | 2.23(1.16)       | 10.37(1.48) | 34.03(14.20) | 3.16(1.96)        | 16.84(2.31) | 51.48(20.88) |

Abbreviations: BMI, body mass index; MET, metabolic equivalent task; aHEI, alternative healthy eating index; MI, myocardial infarction.

\*Values are means (SD) for continuous variables or % for categorical variables. All variables are age-standardized, except for age per se.

<sup>†</sup>Whole grains are excluded when calculating the alternative healthy eating index.

SUPPLEMENTAL MATERIAL

Supplemental Table II. Hazard Ratio (95% CI) of Ischemic Stroke according to Quintiles of Whole Grain Intake among participants in NHS and HPFS.

|                            | Quintiles of Whole Grain Intake |                  |                  |                  |                  | <i>P</i> <sub>trend</sub> |
|----------------------------|---------------------------------|------------------|------------------|------------------|------------------|---------------------------|
|                            | Q1                              | Q2               | Q3               | Q4               | Q5               |                           |
| <b>NHS</b>                 |                                 |                  |                  |                  |                  |                           |
| Median                     | 4.43                            | 10.10            | 15.15            | 21.46            | 33.23            |                           |
| No. of cases/ Person-years | 328/365029                      | 262/367305       | 310/368956       | 282/368999       | 368/368557       |                           |
| Age-adjusted model*        | 1.00                            | 0.77(0.66,0.91)  | 0.87(0.75,1.02)  | 0.73(0.62,0.86)  | 0.84(0.72,0.97)  | 0.07                      |
| <b>HPFS</b>                |                                 |                  |                  |                  |                  |                           |
| Median                     | 5.92                            | 14.47            | 22.35            | 31.50            | 47.90            |                           |
| No. of cases/ Person-years | 188/194616                      | 223/196243       | 167/196459       | 147/197139       | 183/196825       |                           |
| Age-adjusted model*        | 1.00                            | 1.25(1.03,1.51)  | 0.90(0.73,1.11)  | 0.76(0.61,0.95)  | 0.92(0.75,1.13)  | 0.01                      |
| Pooled <sup>†</sup>        |                                 |                  |                  |                  |                  |                           |
| Age-adjusted model*        | 1.00                            | 0.94(0.83, 1.07) | 0.88(0.78, 1.00) | 0.74(0.65, 0.84) | 0.86(0.77, 0.98) | 0.002                     |

Abbreviations: CI, confidence interval; NHS, Nurses' Health Study; HPFS, Health Professionals Follow-up Study.

\* Age-adjusted model was adjusted for age (years).

<sup>†</sup> Pooled hazard ratios were calculated using a fixed-effects meta-analysis.

SUPPLEMENTAL MATERIAL

Supplemental Table III. Hazard Ratio (95% CI) of Ischemic Stroke by Individual Whole Grain Foods Intake among participants in NHS and HPFS.

|                                          | Individual Whole Grain Foods |                                  |                  | Every 1 serving/day | $P_{\text{trend}}$ |
|------------------------------------------|------------------------------|----------------------------------|------------------|---------------------|--------------------|
|                                          | < 1 serving/month            | 1 serving/month - 1 serving/week | > 1 serving/week |                     |                    |
| <i>Whole grain cold breakfast cereal</i> |                              |                                  |                  |                     |                    |
| NHS                                      |                              |                                  |                  |                     |                    |
| No. of cases/ Person-years               | 386/423700                   | 224/263805                       | 940/1151403      |                     |                    |
| Age-adjusted model *                     | 1.00                         | 0.89(0.76,1.05)                  | 0.81(0.72,0.91)  | 0.86(0.74,1.00)     | <0.001             |
| HPFS                                     |                              |                                  |                  |                     |                    |
| No. of cases/ Person-years               | 275/262406                   | 122/134968                       | 511/583908       |                     |                    |
| Age-adjusted model *                     | 1.00                         | 0.94(0.75,1.16)                  | 0.82(0.70,0.95)  | 0.80(0.66,0.96)     | 0.006              |
| Pooled <sup>†</sup>                      |                              |                                  |                  |                     |                    |
| Age-adjusted model *                     | 1.00                         | 0.91(0.80, 1.04)                 | 0.81(0.74, 0.89) | 0.83(0.74,0.94)     | <0.001             |
| <i>Oatmeal</i>                           |                              |                                  |                  |                     |                    |
| NHS                                      |                              |                                  |                  |                     |                    |
| No. of cases/ Person-years               | 543/674537                   | 603/798228                       | 404/366143       |                     |                    |
| Age-adjusted model *                     | 1.00                         | 1.04(0.92,1.17)                  | 0.98(0.86,1.11)  | 0.87(0.65,1.15)     | 0.55               |
| HPFS                                     |                              |                                  |                  |                     |                    |
| No. of cases/ Person-years               | 424/458739                   | 246/274888                       | 238/247655       |                     |                    |
| Age-adjusted model *                     | 1.00                         | 0.92(0.78,1.07)                  | 0.83(0.70,0.97)  | 0.79(0.57,1.09)     | 0.02               |
| Pooled <sup>†</sup>                      |                              |                                  |                  |                     |                    |
| Age-adjusted model *                     | 1.00                         | 0.99(0.90, 1.09)                 | 0.91(0.82, 1.01) | 0.83(0.67,1.03)     | 0.06               |
| <i>Dark Bread</i>                        |                              |                                  |                  |                     |                    |
| NHS                                      |                              |                                  |                  |                     |                    |
| No. of cases/ Person-years               | 103/130512                   | 176/236539                       | 1271/1471857     |                     |                    |
| Age-adjusted model *                     | 1.00                         | 1.03(0.80,1.31)                  | 0.96(0.78,1.17)  | 1.00(0.96,1.05)     | 0.38               |
| HPFS                                     |                              |                                  |                  |                     |                    |
| No. of cases/ Person-years               | 130/124924                   | 122/153822                       | 656/702536       |                     |                    |
| Age-adjusted model *                     | 1.00                         | 0.83(0.65,1.07)                  | 0.87(0.72,1.05)  | 0.96(0.87,1.05)     | 0.44               |

SUPPLEMENTAL MATERIAL

|                            |              |                  |                  |                 |      |
|----------------------------|--------------|------------------|------------------|-----------------|------|
| Pooled <sup>†</sup>        |              |                  |                  |                 |      |
| Age-adjusted model *       | 1.00         | 0.93(0.78, 1.10) | 0.91(0.79, 1.04) | 0.99(0.95,1.03) | 0.24 |
| <i>Brown Rice</i>          |              |                  |                  |                 |      |
| NHS                        |              |                  |                  |                 |      |
| No. of cases/ Person-years | 1029/1248570 | 399/474292       | 122/116045       |                 |      |
| Age-adjusted model *       | 1.00         | 0.95(0.84,1.07)  | 1.05(0.86,1.28)  | 1.00(0.93,1.07) | 0.82 |
| HPFS                       |              |                  |                  |                 |      |
| No. of cases/ Person-years | 438/444974   | 352/387185       | 118/149123       |                 |      |
| Age-adjusted model *       | 1.00         | 1.04(0.90,1.19)  | 1.00(0.81,1.22)  | 0.93(0.52,1.66) | 0.96 |
| Pooled <sup>†</sup>        |              |                  |                  |                 |      |
| Age-adjusted model *       | 1.00         | 0.98(0.90, 1.08) | 1.02(0.89, 1.18) | 1.00(0.93,1.07) | 0.83 |
| <i>Popcorn</i>             |              |                  |                  |                 |      |
| NHS                        |              |                  |                  |                 |      |
| No. of cases/ Person-years | 473/478234   | 719/963695       | 358/396979       |                 |      |
| Age-adjusted model *       | 1.00         | 1.14(1.01,1.28)  | 1.19(1.03,1.36)  | 1.01(0.98,1.03) | 0.04 |
| HPFS                       |              |                  |                  |                 |      |
| No. of cases/ Person-years | 318/279858   | 316/376635       | 274/324789       |                 |      |
| Age-adjusted model *       | 1.00         | 0.94(0.80,1.10)  | 1.08(0.91,1.27)  | 1.04(0.83,1.30) | 0.22 |
| Pooled <sup>†</sup>        |              |                  |                  |                 |      |
| Age-adjusted model *       | 1.00         | 1.06(0.97, 1.17) | 1.14(1.02, 1.27) | 1.01(0.98,1.03) | 0.02 |

Abbreviations: CI, confidence interval; NHS, Nurses' Health Study; HPFS, Health Professionals Follow-up Study.

\* Age-adjusted model was adjusted for age (years).

<sup>†</sup> Pooled hazard ratios were calculated using a fixed-effects meta-analysis.

SUPPLEMENTAL MATERIAL

Supplemental Table IV. Hazard Ratio (95% CI) of Ischemic Stroke by Regular and Light/Fat-free Popcorn Intakes among participants in NHS and HPFS (2002-2010).

|                           | Regular Popcorn intake |                                  |                  | $P_{\text{trend}}$ | Light/Fat-free Popcorn Intake |                                  |                  | $P_{\text{trend}}$ |
|---------------------------|------------------------|----------------------------------|------------------|--------------------|-------------------------------|----------------------------------|------------------|--------------------|
|                           | < 1 serving/month      | 1 serving/month - 1 serving/week | > 1 serving/week |                    | < 1 serving/month             | 1 serving/month - 1 serving/week | > 1 serving/week |                    |
| <b>NHS</b>                |                        |                                  |                  |                    |                               |                                  |                  |                    |
| No. of cases              | 440                    | 120                              | 38               |                    | 421                           | 127                              | 50               |                    |
| Person-years              | 430693                 | 121193                           | 29293            |                    | 384883                        | 145995                           | 50301            |                    |
| Model 1*                  | 1.00                   | 1.20(0.98,1.48)                  | 1.58(1.12,2.24)  | 0.005              | 1.00                          | 0.99(0.81,1.21)                  | 1.20(0.89,1.63)  | 0.24               |
| Model 2 <sup>†</sup>      | 1.00                   | 1.20(0.97,1.47)                  | 1.51(1.06,2.14)  | 0.01               | 1.00                          | 1.00(0.81,1.23)                  | 1.17(0.86,1.58)  | 0.34               |
| Model 3 <sup>‡</sup>      | 1.00                   | 1.21(0.98,1.49)                  | 1.45(1.01,2.07)  | 0.02               | 1.00                          | 1.00(0.81,1.22)                  | 1.11(0.81,1.53)  | 0.51               |
| <b>HPFS</b>               |                        |                                  |                  |                    |                               |                                  |                  |                    |
| No. of cases              | 90                     | 49                               | 26               |                    | 118                           | 31                               | 16               |                    |
| Person-years              | 97183                  | 60119                            | 25798            |                    | 118067                        | 44469                            | 20564            |                    |
| Model 1*                  | 1.00                   | 1.08(0.76,1.54)                  | 1.19(0.77,1.85)  | 0.42               | 1.00                          | 0.88(0.58,1.31)                  | 0.93(0.55,1.58)  | 0.70               |
| Model 2 <sup>†</sup>      | 1.00                   | 1.03(0.72,1.48)                  | 1.16(0.74,1.81)  | 0.55               | 1.00                          | 0.90(0.60,1.35)                  | 0.96(0.57,1.63)  | 0.80               |
| Model 3 <sup>‡</sup>      | 1.00                   | 1.06(0.73,1.52)                  | 1.19(0.76,1.86)  | 0.46               | 1.00                          | 0.88(0.58,1.33)                  | 0.94(0.55,1.60)  | 0.73               |
| <b>Pooled<sup>§</sup></b> |                        |                                  |                  |                    |                               |                                  |                  |                    |
| Model 1*                  | 1.00                   | 1.17(0.98, 1.40)                 | 1.42(1.08, 1.86) | 0.003              | 1.00                          | 0.97(0.81,1.16)                  | 1.13(0.87,1.47)  | 0.31               |
| Model 2 <sup>†</sup>      | 1.00                   | 1.15(0.96, 1.38)                 | 1.36(1.03, 1.80) | 0.01               | 1.00                          | 0.98(0.81,1.17)                  | 1.11(0.85,1.45)  | 0.40               |
| Model 3 <sup>‡</sup>      | 1.00                   | 1.17(0.98, 1.40)                 | 1.34(1.01, 1.77) | 0.02               | 1.00                          | 0.97(0.81,1.17)                  | 1.07(0.81,1.40)  | 0.60               |

Abbreviations: CI, confidence interval; NHS, Nurses' Health Study; HPFS, Health Professionals Follow-up Study.

\* Model 1 was adjusted for age (years).

<sup>†</sup> Model 2 was further adjusted for BMI (<18.5, 18.5-22.9, 23.0-24.9, 25.0-29.9, 30.0-34.9, or  $\geq 35.0$  kg/m<sup>2</sup>), smoking status (never, past, current [1-14,15-24, or  $\geq 25$  cigarettes/day]), alcohol intake (0, 0.1-4.9, 5.0-14.9,  $\geq 15.0$  g/day for women and 0, 0.1-4.9, 5.0-29.9 or  $\geq 30.0$  g/day for men), physical activity (quintiles), family history of diabetes, cancer and heart disease(yes or no), multivitamin use(yes or no), hypertension, high cholesterol at baseline (yes or no), total energy intake (kcal/day) and modified alternative health eating index score, which did not include whole



grains, as a summary measure of diet quality. For women, menopausal status and postmenopausal hormone use were further adjusted for.

‡ Model 3 was further adjusted for butter (serving/day), high fat dairy (g/day), refined grain (g/day) and saturated fat (g/day).

§ Pooled hazard ratios were calculated using a fixed-effects meta-analysis.

SUPPLEMENTAL MATERIAL

Supplemental Table V. Hazard Ratio (95% CI) of Ischemic Stroke by Individual Whole Grain Ingredients Intake among participants in NHS and HPFS.

|                                | Individual Whole Grain Ingredients |                  |                  | <i>P</i> <sub>trend</sub> |
|--------------------------------|------------------------------------|------------------|------------------|---------------------------|
|                                | T1                                 | T2               | T3               |                           |
| <i>Total Bran</i> <sup>‡</sup> |                                    |                  |                  |                           |
| NHS                            |                                    |                  |                  |                           |
| Median                         | 1.10                               | 3.64             | 8.50             |                           |
| No. of cases/ Person-years     | 489/610232                         | 516/615654       | 545/613022       |                           |
| Age-adjusted model *           | 1.00                               | 1.00(0.88,1.15)  | 0.89(0.77,1.03)  | 0.04                      |
| HPFS                           |                                    |                  |                  |                           |
| Median                         | 1.30                               | 4.85             | 11.91            |                           |
| No. of cases/ Person-years     | 334/325482                         | 298/328270       | 276/327530       |                           |
| Age-adjusted model *           | 1.00                               | 0.88(0.74,1.05)  | 0.70(0.58,0.84)  | <0.001                    |
| Pooled <sup>†</sup>            |                                    |                  |                  |                           |
| Age-adjusted model *           | 1.00                               | 0.96(0.86, 1.06) | 0.81(0.72, 0.91) | <0.001                    |
| <i>Total Germ</i> <sup>‡</sup> |                                    |                  |                  |                           |
| NHS                            |                                    |                  |                  |                           |
| Median                         | 0.26                               | 0.63             | 1.26             |                           |
| No. of cases/ Person-years     | 549/603767                         | 480/611376       | 521/623764       |                           |
| Age-adjusted model *           | 1.00                               | 0.90(0.79,1.03)  | 0.94(0.81,1.08)  | 0.62                      |
| HPFS                           |                                    |                  |                  |                           |
| Median                         | 0.34                               | 0.90             | 1.80             |                           |
| No. of cases/ Person-years     | 355/333085                         | 272/321337       | 281/326860       |                           |
| Age-adjusted model *           | 1.00                               | 0.94(0.79,1.12)  | 1.03(0.86,1.24)  | 0.66                      |
| Pooled <sup>†</sup>            |                                    |                  |                  |                           |
| Age-adjusted model *           | 1.00                               | 0.92(0.82, 1.02) | 0.97(0.87, 1.09) | 1.00                      |

Abbreviations: CI, confidence interval; NHS, Nurses' Health Study; HPFS, Health Professionals Follow-up Study.

\* Age-adjusted model was adjusted for age (years).

† Pooled hazard ratios were calculated using a fixed-effects meta-analysis.

‡ Total bran and total germ were mutually adjusted in all models.

Supplemental References

1. Rimm EB, Stampfer MJ, Colditz GA, Chute CG, Litin LB, Willett WC. Validity of self-reported waist and hip circumferences in men and women. *Epidemiology*. 1990;1:466-473
2. Giovannucci E, Colditz G, Stampfer MJ, Rimm EB, Litin L, Sampson L, et al. The assessment of alcohol consumption by a simple self-administered questionnaire. *Am J Epidemiol*. 1991;133:810-817
3. Chasan-Taber S, Rimm EB, Stampfer MJ, Spiegelman D, Colditz GA, Giovannucci E, et al. Reproducibility and validity of a self-administered physical activity questionnaire for male health professionals. *Epidemiology*. 1996;7:81-86
4. Chiuve SE, Fung TT, Rimm EB, Hu FB, McCullough ML, Wang M, et al. Alternative dietary indices both strongly predict risk of chronic disease. *The Journal of nutrition*. 2012;142:1009-1018
